# Supplementary material for: Influences of Semaphorin 3A Expression on Clinicopathological Features, Human Papillomavirus Status, and Prognosis in Oropharyngeal Carcinoma
Source: MDPI journal article supplement (doi:10.3390/microorganisms8091286), 2020-08-22
Supplement: s1 [file s1]

## Supplementary materials

### Supplemental Figure S1

Comparison of different Kaplan-Meier curves for disease free survival for patients grouped by immunohistochemistry levels of SEMA3A.

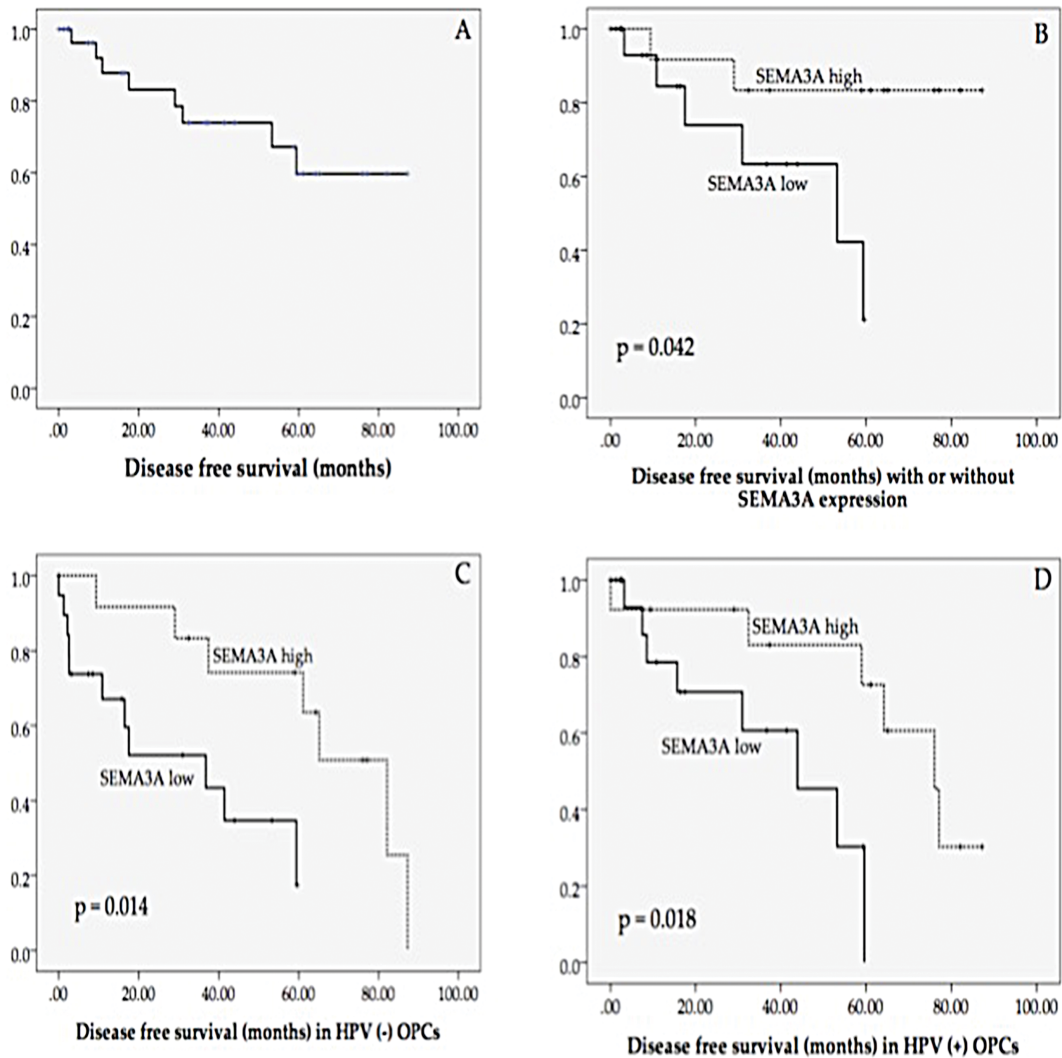

### Supplemental Figure S1

(A). Kaplan-Meier curves for disease free survival (DFS) of the 32 OPC patients. (B). Kaplan-Meier curves for DFS for OPC patients with low and high levels of SEMA3A expression ( $P = 0.042$ ). (C). Kaplan-Meier curves for DFS in patients who were HPV (+) with low and high levels of SEMA3A expression ( $P = 0.018$ ). (D). Kaplan-Meier curves for DFS in patients who were HPV (-) with low and high levels of SEMA3A expression ( $P = 0.014$ ).

## Supplementary materials

### Supplemental Table S1

Cox propotional hazard regression analysis of 32 OPC patients with overall survival

| Variables                                      | Univariate analysis  |          | Multivariate analysis |          |
|------------------------------------------------|----------------------|----------|-----------------------|----------|
|                                                | HR (95% CI)          | <i>p</i> | HR (95% CI)           | <i>p</i> |
| Sex                                            | 1.379 (0.166-11.424) | 0.76     |                       | NI       |
| Age (years)                                    | 0.717 (0.143-3.588)  | 0.68     |                       | NI       |
| Semaphorin 3A                                  | 0.192 (0.036-1.925)  | 0.05     | 0.307 (0.055-1.718)   | 0.179    |
| Histological grade ( poorly, moderately, well) | 1.192 (0.504-2.815)  | 0.68     |                       | NI       |
| Subsite ( lateral, frontal, upper)             | 0.47 (0.072-3.054)   | 0.42     |                       | NI       |
| TNM stage ( I-II, III-IV)                      | 1.696 (0.402-7.152)  | 0.47     |                       | NI       |
| Tumor stage (T1-2, T3-4)                       | 2.226 (0.549-9.024)  | 0.26     |                       | NI       |
| Lymph node metastasis (negative, positive)     | 0.184 (0.036- 0.929) | 0.04     | 0.275 (0.05-1.503)    | 0.136    |
| HPV (negative, positive)                       | 0.629 (0.15-2.640)   | 0.52     |                       | NI       |
| Smoking                                        | 0.355 (0.067-1.881)  | 0.22     |                       | NI       |
| Alcohol                                        | 1.776 (0.349-9.037)  | 0.48     |                       | NI       |

Factors with *p* value greater than 0.05 in the univariate models were not included (NI) in the multivariate analysis

P-value < 0.05 was considered statistically significant

### Supplemental Table S1

A univariate Cox regression analysis did not show a significant association of age ( $\geq 50$ ), sex, histological grade, subsite, tumor status, stage, HPV, smoking and drinking. Univariate Cox regression analysis showed that lymphonode metastasis and SEMA3A expression represented significant hazards.

## Supplementary materials

### Supplemental Table S2

Cox propotional hazard regression analysis of 32 OPC patients with disease free survival

| Variables                                      | Univariate analysis  |          |
|------------------------------------------------|----------------------|----------|
|                                                | HR (95% CI)          | <i>p</i> |
| Sex                                            | 1.575 (0.191-12.959) | 0.673    |
| Age (years)                                    | 0.673 (0.135-3.366)  | 0.63     |
| Semaphorin 3A                                  | 0.21 (0.41-1.078)    | 0.062    |
| Histological grade ( poorly, moderately, well) | 1.223 (0.522-2.866)  | 0.643    |
| Subsite ( lateral, frontal, upper)             | 0.434 (0.064-2.963)  | 0.395    |
| TNM stage ( I-II, III-IV)                      | 1.787 (0.425-7.504)  | 0.428    |
| Tumor stage (T1-2, T3-4)                       | 2.507 (0.615-10.228) | 0.2      |
| Lymph node metastasis (negative, positive)     | 0.147 (0.027- 0.792) | 0.026    |
| HPV (negative, positive)                       | 0.635 (0.151-2.666)  | 0.535    |
| Smoking                                        | 0.502 (0.108-2.329)  | 0.378    |
| Alcohol                                        | 1.866 (0.366-9.498)  | 0.453    |

P-value < 0.05 was considered statistically significant

### Supplemental Table S2

A univariate Cox regression analysis did not show a significant association of age ( $\geq 50$ ), sex, SEMA3A, histological grade, subsite, tumor status, lymph node metastasis, stage, HPV, smoking and drinking.
